# Supplementary material
Source: PubMed Central journal article supplement (PMC3121972)
Supplement: epi0605_0593SD1.pdf [file epi0605_0593SD1.pdf]

**Supplemental Data**

**Supplementary Figure 1**

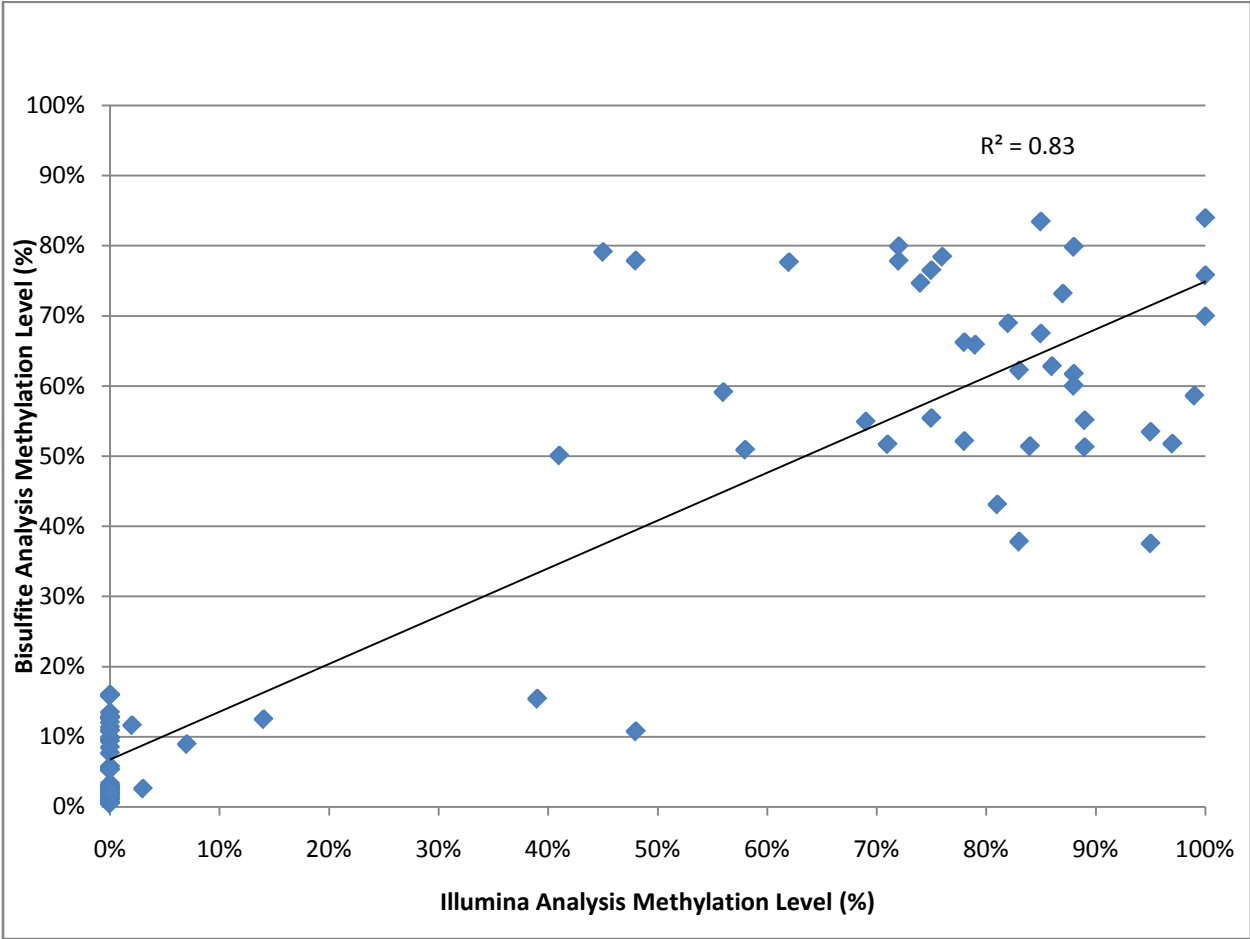

Supplementary Figure 2

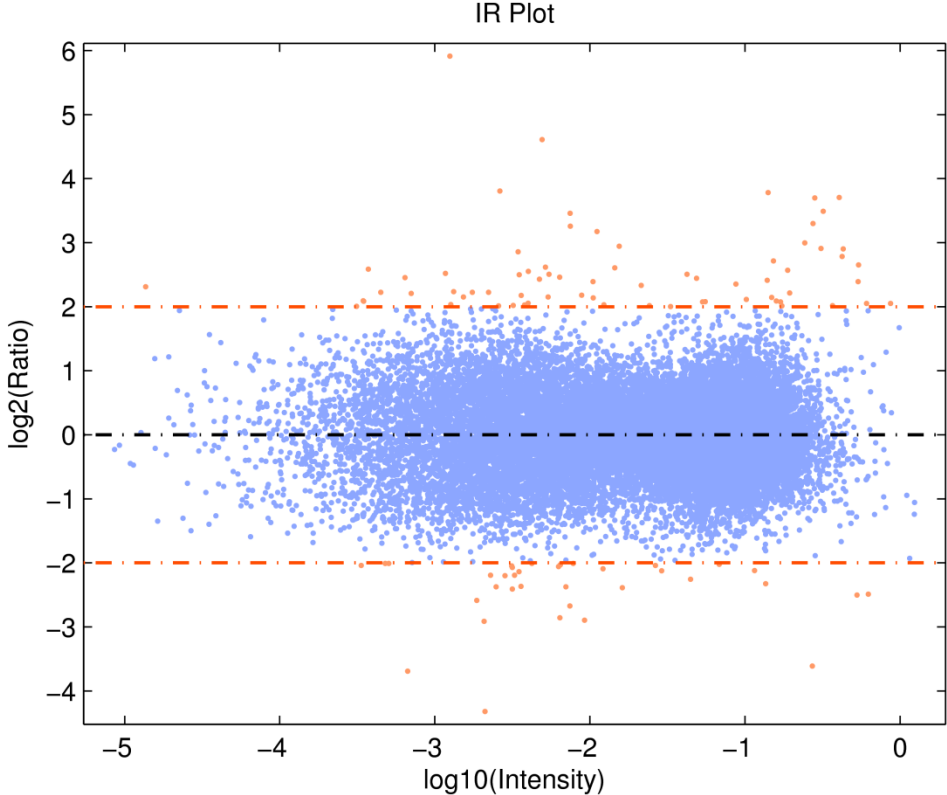

ce.

**Supplemental Table 1.** Genes hypomethylated CD4+ T cells from lupus patients compared to controls. Target IDs represent unique IDs on Illumina Infinium HumanMethylation27 array, Symbol and Product represent gene name and description, Case and Control averages represent percent of methylation in each group, Ratio highlight the level of relative hypomethylation as compared with control group, *P* value represent statistical significance of associative t-test (0 indicates p-value too small to be outputted).

| Target ID  | Symbol   | Product                                                                  | Case average | Control average | Ratio | <i>P</i> value |
|------------|----------|--------------------------------------------------------------------------|--------------|-----------------|-------|----------------|
| cg01395672 | ZNF207   | zinc finger protein 207 isoform b                                        | 0.07         | 0.11            | 1.62  | 1.16E-07       |
| cg06397837 | HOXA13   | homeobox protein A13                                                     | 0.04         | 0.05            | 1.35  | 2.81E-07       |
| cg02937479 | FKBPL    | WAF-1/CIP1 stabilizing protein 39                                        | 0.04         | 0.05            | 1.27  | 2.32E-06       |
| cg04981492 | SYDE1    | synapse defective 1; Rho GTPase; homolog 1                               | 0.04         | 0.05            | 1.40  | 1.28E-10       |
| cg11189837 | ADAMTS1  | ADAM metalloproteinase with thrombospondin type 1 motif; 1 preproprotein | 0.03         | 0.04            | 1.57  | 3.88E-05       |
| cg18488855 | NOVA1    | neuro-oncological ventral antigen 1 isoform 2                            | 0.04         | 0.05            | 1.19  | 8.46E-06       |
| cg17980508 | IFI44L   | histocompatibility 28                                                    | 0.48         | 0.57            | 1.20  | 0              |
| cg12789833 | FBXO22   | F-box only protein 22 isoform b                                          | 0.07         | 0.09            | 1.19  | 3.62E-05       |
| cg16977257 | PRND     | prion-like protein doppel preproprotein                                  | 0.03         | 0.04            | 1.39  | 8.72E-09       |
| cg23490074 | C19orf2  | RPB5-mediating protein isoform a                                         | 0.08         | 0.10            | 1.29  | 2.88E-08       |
| cg22736323 | PDGFRA   | platelet-derived growth factor receptor alpha precursor                  | 0.16         | 0.20            | 1.20  | 2.57E-07       |
| cg07889201 | ZNF343   | zinc finger protein 343                                                  | 0.04         | 0.07            | 1.53  | 5.24E-11       |
| cg15881727 | ZBED4    | zinc finger; BED domain containing 4                                     | 0.05         | 0.07            | 1.38  | 1.73E-07       |
| cg11197066 | PGAP1    | GPI deacylase                                                            | 0.04         | 0.05            | 1.41  | 1.04E-06       |
| cg17158059 | MGC15407 | hypothetical protein LOC112942                                           | 0.03         | 0.04            | 1.48  | 7.6E-09        |
| cg02214188 | BDH2     | 3-hydroxybutyrate dehydrogenase; type 2                                  | 0.10         | 0.12            | 1.26  | 2.67E-07       |
| cg25335775 | MRPS14   | mitochondrial ribosomal protein S14                                      | 0.09         | 0.12            | 1.29  | 1.34E-10       |
| cg24502084 | MAPBPIP  | mitogen-activated protein-binding protein-interacting protein            | 0.02         | 0.03            | 1.25  | 2.75E-05       |
| cg09254939 | KLK10    | kallikrein 10 precursor                                                  | 0.05         | 0.07            | 1.40  | 9.09E-09       |
| cg15045441 | C6orf155 | hypothetical protein LOC79940                                            | 0.06         | 0.08            | 1.31  | 8.16E-16       |
| cg13282951 | UHRF1    | ubiquitin-like; containing PHD and RING finger domains; 1                | 0.05         | 0.07            | 1.40  | 5.06E-08       |
| cg11372831 | PPAT     | phosphoribosyl pyrophosphate amidotransferase proprotein                 | 0.06         | 0.08            | 1.30  | 3.19E-09       |
| cg16094520 | SHMT1    | serine hydroxymethyltransferase 1 (soluble) isoform 1                    | 0.05         | 0.06            | 1.19  | 1.18E-06       |
| cg23652526 | HNRPUL1  | E1B-55kDa-associated protein 5 isoform d                                 | 0.02         | 0.04            | 2.10  | 1.04E-09       |
| cg18504532 | RABGAP1L | RAB GTPase activating protein 1-like                                     | 0.02         | 0.03            | 1.66  | 1.26E-07       |
| cg21262854 | FLJ20097 | hypothetical protein LOC55610                                            | 0.02         | 0.04            | 1.59  | 3.59E-07       |

|            |         |                                                                                |      |      |      |          |
|------------|---------|--------------------------------------------------------------------------------|------|------|------|----------|
|            |         | isoform b                                                                      |      |      |      |          |
| cg09462826 | FADS1   | fatty acid desaturase 1                                                        | 0.04 | 0.06 | 1.43 | 3.07E-17 |
| cg00230502 | CCDC60  | hypothetical protein LOC160777                                                 | 0.04 | 0.06 | 1.50 | 2.41E-11 |
| cg13992856 | FLOT2   | flotillin 2                                                                    | 0.03 | 0.04 | 1.37 | 5.47E-07 |
| cg03143365 | MAN2B1  | mannosidase; alpha; class 2B; member 1 precursor                               | 0.03 | 0.04 | 1.41 | 1.96E-05 |
| cg21685266 | EHHADH  | enoyl-Coenzyme A; hydratase/3-hydroxyacyl Coenzyme A dehydrogenase             | 0.08 | 0.11 | 1.42 | 6.72E-23 |
| cg12946690 | SMG6    | Est1p-like protein A                                                           | 0.07 | 0.10 | 1.35 | 2.68E-13 |
| cg00376639 | ZNF581  | zinc finger protein 581                                                        | 0.06 | 0.08 | 1.30 | 7.51E-08 |
| cg22579849 | DCTN3   | dynactin 3 isoform 2                                                           | 0.03 | 0.05 | 1.40 | 8.38E-16 |
| cg15309223 | C1orf83 | hypothetical protein LOC127428                                                 | 0.08 | 0.11 | 1.30 | 3.17E-06 |
| cg10912268 | SPTLC1  | serine palmitoyltransferase subunit 1 isoform a                                | 0.11 | 0.14 | 1.33 | 6.12E-09 |
| cg26365854 | ALX4    | aristaless-like homeobox 4                                                     | 0.09 | 0.13 | 1.43 | 3.55E-07 |
| cg13617705 | SMEK2   | hypothetical protein LOC57223                                                  | 0.23 | 0.29 | 1.30 | 1.08E-06 |
| cg19248557 | HLA-DRA | major histocompatibility complex; class II; DR alpha precursor                 | 0.09 | 0.11 | 1.31 | 2.43E-05 |
| cg11489580 | G3BP2   | Ras-GTPase activating protein SH3 domain-binding protein 2 isoform a           | 0.06 | 0.09 | 1.49 | 3.77E-05 |
| cg08736146 | MRPL10  | mitochondrial ribosomal protein L10 isoform a                                  | 0.04 | 0.06 | 1.41 | 2.51E-15 |
| cg09433780 | APPL    | adaptor protein containing pH domain; PTB domain and leucine zipper motif      | 0.06 | 0.08 | 1.42 | 1.09E-12 |
| cg02551396 | JPH2    | junctophilin 2 isoform 2                                                       | 0.06 | 0.08 | 1.32 | 6.68E-10 |
| cg11657808 | RYR2    | ryanodine receptor 2                                                           | 0.04 | 0.05 | 1.33 | 4.06E-05 |
| cg09310112 | JMJD2B  | jumonji domain containing 2B                                                   | 0.14 | 0.18 | 1.33 | 3.67E-05 |
| cg25764464 | PLEKHA5 | pleckstrin homology domain containing; family A member 5                       | 0.03 | 0.05 | 1.33 | 3.95E-05 |
| cg04010530 | NR4A2   | nuclear receptor subfamily 4; group A; member 2 isoform a                      | 0.09 | 0.12 | 1.26 | 2.45E-05 |
| cg02096656 | HSPC268 | hypothetical protein LOC154791                                                 | 0.09 | 0.13 | 1.56 | 3.34E-10 |
| cg15864184 | PTPN1   | protein tyrosine phosphatase; non-receptor type 1                              | 0.17 | 0.21 | 1.22 | 2.16E-27 |
| cg09929612 | ATP5J2  | ATP synthase; H+ transporting; mitochondrial F0 complex; subunit F2 isoform 2a | 0.09 | 0.12 | 1.36 | 5.02E-07 |
| cg14271400 | EPHB2   | ephrin receptor EphB2 isoform 2 precursor                                      | 0.07 | 0.09 | 1.36 | 9.47E-07 |
| cg22688260 | ZCSL2   | zinc finger; CSL domain containing 2                                           | 0.03 | 0.04 | 1.32 | 3.77E-10 |
| cg13802966 | CASP1   | caspase 1 isoform delta                                                        | 0.12 | 0.15 | 1.25 | 6.66E-10 |
| cg22541143 | HEL308  | DNA helicase HEL308                                                            | 0.15 | 0.18 | 1.24 | 1.45E-12 |
| cg23539753 | SP100   | nuclear antigen Sp100                                                          | 0.05 | 0.06 | 1.26 | 4.62E-07 |
| cg26674132 | ZNF559  | zinc finger protein 559                                                        | 0.16 | 0.20 | 1.20 | 5.7E-06  |
| cg03270167 | RAMP1   | receptor activity-modifying protein 1 precursor                                | 0.11 | 0.15 | 1.34 | 1.93E-05 |
| cg03395546 | ADCK4   | aarF domain containing kinase 4                                                | 0.14 | 0.17 | 1.21 | 8.06E-13 |

|            |          |                                                                                 |      |      |      |          |
|------------|----------|---------------------------------------------------------------------------------|------|------|------|----------|
| cg00873937 | ATOH7    | atonal homolog 7                                                                | 0.06 | 0.07 | 1.21 | 1.61E-13 |
| cg13757640 | ARHGAP8  | Rho GTPase activating protein 8 isoform 2                                       | 0.07 | 0.09 | 1.26 | 2.38E-06 |
| cg06323427 | PDCD10   | programmed cell death 10                                                        | 0.07 | 0.09 | 1.26 | 1.25E-05 |
| cg04970352 | ALX4     | aristaless-like homeobox 4                                                      | 0.06 | 0.08 | 1.23 | 4.48E-06 |
| cg03199651 | MSX1     | msh homeo box homolog 1                                                         | 0.06 | 0.08 | 1.23 | 2.41E-05 |
| cg02548238 | LOX      | lysyl oxidase preproprotein                                                     | 0.04 | 0.05 | 1.36 | 1.93E-05 |
| cg24399106 | MGC45800 | hypothetical protein LOC90768                                                   | 0.04 | 0.05 | 1.24 | 1.55E-05 |
| cg03856723 | PRKACA   | cAMP-dependent protein kinase catalytic subunit alpha isoform 1                 | 0.16 | 0.19 | 1.19 | 8.81E-07 |
| cg13793354 | MCCC2    | methylcrotonoyl-Coenzyme A carboxylase 2 (beta)                                 | 0.05 | 0.07 | 1.47 | 1.68E-06 |
| cg11680158 | C9orf52  | hypothetical protein LOC158219                                                  | 0.03 | 0.04 | 1.26 | 3.49E-05 |
| cg15676241 | ITGA2    | integrin alpha 2 precursor                                                      | 0.07 | 0.08 | 1.25 | 3.42E-09 |
| cg17420360 | FLJ13236 | hypothetical protein FLJ13236                                                   | 0.04 | 0.05 | 1.29 | 3.98E-06 |
| cg07075930 | PTPRM    | protein tyrosine phosphatase; receptor type; M precursor                        | 0.07 | 0.09 | 1.20 | 3.28E-05 |
| cg17190608 | CUTL2    | cut-like 2                                                                      | 0.02 | 0.03 | 1.39 | 6.02E-08 |
| cg12243255 | AXUD1    | AXIN1 up-regulated 1                                                            | 0.02 | 0.03 | 1.42 | 5.77E-10 |
| cg25261908 | TRPM4    | transient receptor potential cation channel; subfamily M; member 4              | 0.03 | 0.05 | 1.41 | 5.14E-13 |
| cg08355944 | SLC37A3  | solute carrier family 37 (glycerol-3-phosphate transporter); member 3 isoform 2 | 0.02 | 0.03 | 1.60 | 1.89E-14 |
| cg16785344 | PXN      | paxillin                                                                        | 0.04 | 0.06 | 1.40 | 5.01E-09 |
| cg12124516 | MCM6     | minichromosome maintenance protein 6                                            | 0.05 | 0.06 | 1.38 | 1.54E-07 |
| cg00973286 | TNFRSF1A | tumor necrosis factor receptor 1 precursor                                      | 0.03 | 0.04 | 1.31 | 3.19E-05 |
| cg00047050 | CUL5     | Vasopressin-activated calcium-mobilizing receptor-1                             | 0.04 | 0.06 | 1.38 | 5.32E-06 |
| cg10570177 | C9orf7   | hypothetical protein LOC11094                                                   | 0.04 | 0.06 | 1.32 | 1.56E-05 |
| cg09234872 | TRAF7    | ring finger and WD repeat domain 1 isoform 1                                    | 0.03 | 0.03 | 1.19 | 2.06E-06 |
| cg14966252 | ZNF622   | zinc finger protein 622                                                         | 0.03 | 0.04 | 1.46 | 9.75E-09 |
| cg21939482 | MGC12966 | hypothetical protein LOC84792                                                   | 0.03 | 0.04 | 1.34 | 6.33E-14 |
| cg16248277 | FGF8     | fibroblast growth factor 8 isoform F precursor                                  | 0.11 | 0.14 | 1.21 | 2.54E-12 |
| cg12024906 | HKR1     | GLI-Kruppel family member HKR1                                                  | 0.29 | 0.39 | 1.33 | 5.37E-09 |
| cg15279364 | TMEM130  | hypothetical protein LOC222865                                                  | 0.10 | 0.13 | 1.36 | 1.37E-10 |
| cg05019661 | ADK      | adenosine kinase isoform a                                                      | 0.02 | 0.03 | 1.85 | 8.08E-06 |
| cg07112210 | MGAT5B   | beta(1;6)-N-acetylglucosaminyltransferase V isoform 1                           | 0.25 | 0.30 | 1.24 | 1.96E-05 |
| cg11407345 | C21orf58 | hypothetical protein LOC54058 isoform 2                                         | 0.02 | 0.04 | 1.61 | 0        |
| cg25999015 | ZNF575   | zinc finger protein 575                                                         | 0.02 | 0.03 | 1.51 | 4.21E-07 |
| cg08049198 | AGPAT1   | 1-acylglycerol-3-phosphate O-                                                   | 0.02 | 0.04 | 1.68 | 1.61E-25 |

|            |          |                                                                                 |      |      |      |          |
|------------|----------|---------------------------------------------------------------------------------|------|------|------|----------|
|            |          | acyltransferase 1                                                               |      |      |      |          |
| cg16418684 | VWCE     | hypothetical protein LOC220001                                                  | 0.02 | 0.03 | 1.27 | 8.52E-06 |
| cg01735903 | POLR3D   | RNA polymerase III 53 kDa subunit RPC4                                          | 0.07 | 0.09 | 1.33 | 6.13E-07 |
| cg13854874 | CHAF1B   | chromatin assembly factor 1 subunit B                                           | 0.15 | 0.18 | 1.22 | 6.3E-07  |
| cg24528523 | SLC22A18 | tumor suppressing subtransferable candidate 5                                   | 0.04 | 0.04 | 1.20 | 3.33E-05 |
| cg18170080 | ESAM     | endothelial cell adhesion molecule                                              | 0.03 | 0.04 | 1.25 | 1.31E-12 |
| cg23152772 | FIBCD1   | fibrinogen C domain containing 1                                                | 0.14 | 0.17 | 1.21 | 1.62E-08 |
| cg22402007 | NTRK2    | neurotrophic tyrosine kinase; receptor; type 2 isoform b precursor              | 0.09 | 0.11 | 1.26 | 5.49E-06 |
| cg16797831 | KIAA1324 | hypothetical protein LOC57535                                                   | 0.06 | 0.08 | 1.26 | 1.11E-07 |
| cg20712430 | KREMEN2  | kringle-containing transmembrane protein 2 isoform b precursor                  | 0.04 | 0.06 | 1.45 | 1E-18    |
| cg05774801 | SFRP2    | secreted frizzled-related protein 2 precursor                                   | 0.04 | 0.06 | 1.47 | 1.57E-11 |
| cg09622447 | CBS      | cystathionine-beta-synthase                                                     | 0.04 | 0.05 | 1.23 | 9.8E-08  |
| cg03777459 | GATA5    | GATA binding protein 5                                                          | 0.03 | 0.05 | 1.52 | 3.8E-13  |
| cg12928668 | SEMA6A   | sema domain; transmembrane domain (TM); and cytoplasmic domain; (semaphorin) 6A | 0.02 | 0.03 | 1.79 | 6E-17    |
| cg08806153 | HOXD11   | homeobox D11                                                                    | 0.03 | 0.04 | 1.36 | 5.29E-08 |
| cg21621248 | LRRTM1   | leucine rich repeat transmembrane neuronal 1                                    | 0.04 | 0.06 | 1.29 | 1.63E-08 |
| cg07271264 | MYOD1    | myogenic differentiation 1                                                      | 0.06 | 0.09 | 1.38 | 1.46E-06 |
| cg24794531 | TRPC1    | transient receptor potential cation channel; subfamily C; member 1              | 0.04 | 0.07 | 1.62 | 0        |
| cg05989054 | GAMT     | guanidinoacetate N-methyltransferase isoform a                                  | 0.29 | 0.36 | 1.22 | 2.68E-17 |
| cg02310296 | MMP9     | matrix metalloproteinase 9 preproprotein                                        | 0.14 | 0.17 | 1.25 | 6.25E-09 |
| cg10465696 | ROBO4    | roundabout homolog 4; magic roundabout                                          | 0.26 | 0.33 | 1.28 | 0        |
| cg25687894 | ACLY     | ATP citrate lyase isoform 1                                                     | 0.11 | 0.17 | 1.51 | 6.84E-13 |
| cg11354906 | SFRP2    | secreted frizzled-related protein 2 precursor                                   | 0.06 | 0.08 | 1.39 | 1.42E-06 |
| cg19006008 | F2RL3    | coagulation factor II (thrombin) receptor-like 3                                | 0.02 | 0.03 | 1.43 | 2.01E-06 |
| cg20483374 | C1QTNF5  | C1q and tumor necrosis factor related protein 5                                 | 0.21 | 0.26 | 1.20 | 5.2E-07  |
| cg26219051 | SCUBE1   | signal peptide-CUB domain-EGF-related 1                                         | 0.07 | 0.10 | 1.35 | 7.2E-06  |
| cg07737781 | WBSCR14  | Williams Beuren syndrome chromosome region 14 isoform alpha                     | 0.03 | 0.05 | 1.44 | 1.32E-05 |
| cg02506426 | AQP11    | aquaporin 11                                                                    | 0.02 | 0.03 | 1.46 | 2E-15    |
| cg24056567 | PSD3     | ADP-ribosylation factor guanine nucleotide factor 6 isoform a                   | 0.11 | 0.14 | 1.22 | 1.26E-05 |
| cg25996835 | BBS4     | Bardet-Biedl syndrome 4                                                         | 0.03 | 0.05 | 1.41 | 6.03E-06 |
| cg03667047 | KL       | klotho isoform a                                                                | 0.05 | 0.06 | 1.35 | 3.05E-06 |
| cg22461835 | ADRA1A   | alpha-1A-adrenergic receptor isoform                                            | 0.06 | 0.07 | 1.22 | 8.49E-06 |

|            |          | 3                                                                   |      |      |      |          |
|------------|----------|---------------------------------------------------------------------|------|------|------|----------|
| cg24530795 | FAM109A  | hypothetical protein LOC144717                                      | 0.04 | 0.05 | 1.40 | 1.01E-07 |
| cg23004625 | PIGM     | PIG-M mannosyltransferase                                           | 0.11 | 0.13 | 1.19 | 5.75E-06 |
| cg12099051 | SAMHD1   | SAM domain- and HD domain-containing protein 1                      | 0.05 | 0.07 | 1.30 | 6.57E-10 |
| cg18875839 | KIF13B   | kinesin family member 13B                                           | 0.02 | 0.03 | 1.42 | 3.33E-08 |
| cg01447420 | FEN1     | flap structure-specific endonuclease 1                              | 0.03 | 0.05 | 1.88 | 9.82E-11 |
| cg03147542 | CBLL1    | Cas-Br-M (murine) ecotropic retroviral transforming sequence-like 1 | 0.05 | 0.08 | 1.41 | 1.31E-05 |
| cg14415034 | SACM1L   | suppressor of actin 1                                               | 0.03 | 0.03 | 1.31 | 4.41E-11 |
| cg19136717 | ARIH1    | ariadne homolog; ubiquitin-conjugating enzyme E2 binding protein; 1 | 0.03 | 0.04 | 1.32 | 9.46E-06 |
| cg27087572 | LSM1     | Lsm1 protein                                                        | 0.05 | 0.06 | 1.21 | 5.38E-06 |
| cg19955521 | WDR37    | WD repeat domain 37                                                 | 0.04 | 0.05 | 1.31 | 4.08E-12 |
| cg06150468 | SNFT     | Jun dimerization protein p21SNFT                                    | 0.04 | 0.05 | 1.30 | 7.9E-14  |
| cg18312782 | TEX2     | testis expressed sequence 2                                         | 0.11 | 0.15 | 1.33 | 6.57E-07 |
| cg17691309 | TPM2     | tropomyosin 2 (beta) isoform 1                                      | 0.02 | 0.06 | 2.80 | 6.72E-17 |
| cg03702236 | SEMA5A   | semaphorin 5A                                                       | 0.08 | 0.10 | 1.26 | 2.74E-06 |
| cg03027037 | NAPB     | N-ethylmaleimide-sensitive factor attachment protein; beta          | 0.03 | 0.04 | 1.24 | 3.56E-06 |
| cg11158729 | CNNM4    | cyclin M4                                                           | 0.03 | 0.04 | 1.36 | 6.28E-09 |
| cg11620873 | CD9      | CD9 antigen                                                         | 0.03 | 0.03 | 1.31 | 1.66E-05 |
| cg15202954 | VGCNL1   | voltage gated channel like 1                                        | 0.09 | 0.12 | 1.27 | 2.51E-05 |
| cg20345446 | OSBPL5   | oxysterol-binding protein-like protein 5 isoform a                  | 0.15 | 0.20 | 1.30 | 1.53E-07 |
| cg14044580 | PCTK1    | PCTAIRE protein kinase 1                                            | 0.08 | 0.12 | 1.45 | 1.29E-08 |
| cg24723331 | ST8SIA1  | ST8 alpha-N-acetyl-neuraminide alpha-2;8-sialyltransferase 1        | 0.02 | 0.04 | 1.76 | 3.28E-07 |
| cg13964084 | C6orf134 | hypothetical protein LOC79969 isoform 2                             | 0.02 | 0.04 | 1.97 | 1.35E-05 |
| cg22956315 | TTC1     | tetratricopeptide repeat domain 1                                   | 0.02 | 0.03 | 1.66 | 2.81E-06 |
| cg07054788 | RPL5     | ribosomal protein L5                                                | 0.03 | 0.05 | 1.41 | 1.43E-05 |
| cg05822100 | CDH6     | cadherin 6; type 2 preproprotein                                    | 0.03 | 0.04 | 1.30 | 2.35E-05 |
| cg04461802 | GPR126   | G protein-coupled receptor 126 beta 1                               | 0.11 | 0.14 | 1.33 | 2.25E-06 |
| cg00767581 | HOXD4    | homeobox D4                                                         | 0.20 | 0.27 | 1.33 | 1.14E-08 |
| cg15021531 | DDIT3    | DNA-damage-inducible transcript 3                                   | 0.04 | 0.06 | 1.51 | 4.53E-07 |
| cg07006042 | ATP1B3   | Na <sup>+</sup> /K <sup>+</sup> -ATPase beta 3 subunit              | 0.04 | 0.06 | 1.33 | 2.99E-08 |
| cg00331237 | CSRP2    | cysteine and glycine-rich protein 2                                 | 0.08 | 0.11 | 1.33 | 4.52E-09 |
| cg18677965 | DDX27    | DEAD (Asp-Glu-Ala-Asp) box polypeptide 27                           | 0.02 | 0.04 | 1.95 | 5.26E-07 |
| cg09226684 | KLK10    | kallikrein 10 precursor                                             | 0.12 | 0.14 | 1.19 | 4.18E-06 |
| cg10162464 | ZNF282   | zinc finger protein 282                                             | 0.03 | 0.04 | 1.42 | 5.82E-10 |
| cg14191109 | SLC25A16 | solute carrier family 25; member 16                                 | 0.09 | 0.13 | 1.35 | 1.67E-05 |
| cg05454446 | BMS1L    | BMS1-like; ribosome assembly protein                                | 0.23 | 0.28 | 1.24 | 4.64E-06 |



|            |          |                                                                      |      |      |      |          |
|------------|----------|----------------------------------------------------------------------|------|------|------|----------|
| cg13766096 | ING1     | inhibitor of growth family; member 1 isoform D                       | 0.05 | 0.08 | 1.65 | 5.56E-12 |
| cg16741710 | TP73     | tumor protein p73                                                    | 0.05 | 0.07 | 1.34 | 3.86E-05 |
| cg23610841 | PURG     | purine-rich element binding protein G isoform A                      | 0.03 | 0.04 | 1.38 | 1.47E-05 |
| cg02608292 | RPL28    | ribosomal protein L28                                                | 0.04 | 0.05 | 1.42 | 5.82E-12 |
| cg15156078 | RASGRF1  | Ras protein-specific guanine nucleotide-releasing factor 1 isoform 1 | 0.05 | 0.07 | 1.30 | 4.17E-10 |
| cg25629694 | SMURF2   | SMAD specific E3 ubiquitin protein ligase 2                          | 0.05 | 0.06 | 1.34 | 2.83E-07 |
| cg09266965 | TRIM52   | hypothetical protein LOC84851                                        | 0.03 | 0.05 | 1.38 | 9.98E-09 |
| cg08441546 | DREV1    | hypothetical protein LOC51108                                        | 0.03 | 0.04 | 1.64 | 1.03E-11 |
| cg13591701 | FAM20A   | family with sequence similarity 20; member A                         | 0.05 | 0.06 | 1.21 | 3.4E-09  |
| cg26611683 | FOXO1A   | forkhead box O1A                                                     | 0.05 | 0.06 | 1.20 | 1.92E-05 |
| cg12556134 | TGIF2    | TGFB-induced factor 2                                                | 0.13 | 0.17 | 1.32 | 5.69E-09 |
| cg23898073 | GFRA1    | GDNF family receptor alpha 1 isoform a preproprotein                 | 0.02 | 0.04 | 1.69 | 4.54E-07 |
| cg27650434 | MYCL1    | l-myc-1 proto-oncogene isoform 2                                     | 0.03 | 0.04 | 1.49 | 1.91E-07 |
| cg19049316 | FHIT     | fragile histidine triad gene                                         | 0.03 | 0.05 | 1.39 | 2.8E-06  |
| cg25519930 | CACNA1C  | calcium channel; voltage-dependent; L type; alpha 1C subunit         | 0.04 | 0.04 | 1.26 | 1.94E-05 |
| cg23699324 | CTNNA2   | catenin; alpha 2                                                     | 0.07 | 0.09 | 1.22 | 1.57E-06 |
| cg00491839 | PPP1R15A | protein phosphatase 1; regulatory subunit 15A                        | 0.02 | 0.05 | 1.88 | 1.29E-15 |
| cg26656135 | EYA4     | eyes absent 4 isoform a                                              | 0.02 | 0.05 | 1.87 | 1.26E-06 |
| cg06310844 | PDCD5    | programmed cell death 5                                              | 0.10 | 0.14 | 1.35 | 6.77E-07 |
| cg02224920 | B3GALT6  | UDP-Gal:betaGal beta 1;3-galactosyltransferase polypeptide 6         | 0.03 | 0.04 | 1.54 | 5.96E-06 |
| cg03933322 | CSAD     | cysteine sulfinic acid decarboxylase-related protein 2               | 0.27 | 0.33 | 1.24 | 7.27E-06 |
| cg16290693 | SPSB1    | SPRY domain-containing SOCS box protein SSB-1                        | 0.10 | 0.16 | 1.55 | 1.92E-18 |
| cg14223017 | AP3D1    | adaptor-related protein complex 3; delta 1 subunit                   | 0.04 | 0.06 | 1.52 | 1.83E-07 |
| cg11296937 | HSPC152  | hypothetical protein LOC51504                                        | 0.06 | 0.10 | 1.66 | 6.66E-23 |
| cg18758482 | ZBTB8OS  | zinc finger and BTB domain containing 8 opposite strand              | 0.25 | 0.30 | 1.21 | 1.6E-12  |
| cg27649653 | ZNF8     | zinc finger protein 8                                                | 0.10 | 0.13 | 1.30 | 2.93E-07 |
| cg25820971 | SUPT16H  | chromatin-specific transcription elongation factor large subunit     | 0.03 | 0.04 | 1.69 | 1.83E-15 |
| cg06983551 | BUB1     | BUB1 budding uninhibited by benzimidazoles 1 homolog                 | 0.04 | 0.06 | 1.38 | 3.49E-11 |
| cg23152667 | TBCA     | beta-tubulin cofactor A                                              | 0.03 | 0.04 | 1.45 | 3.18E-10 |
| cg05874478 | PSME2    | proteasome activator subunit 2                                       | 0.07 | 0.10 | 1.38 | 6.7E-11  |
| cg11233228 | CDC26    | CDC26 subunit of anaphase promoting complex                          | 0.03 | 0.04 | 1.28 | 3.56E-08 |
| cg01677177 | ZBTB26   | zinc finger protein 483                                              | 0.05 | 0.06 | 1.19 | 4.32E-06 |
| cg20938689 | COX7C    | cytochrome c oxidase subunit VIIc                                    | 0.29 | 0.35 | 1.22 | 1.86E-11 |



|            |          |                                                                      |      |      |      |          |
|------------|----------|----------------------------------------------------------------------|------|------|------|----------|
|            |          | precursor                                                            |      |      |      |          |
| cg23073111 | ESRRA    | estrogen-related receptor alpha                                      | 0.19 | 0.24 | 1.24 | 1.09E-07 |
| cg16118817 | FEM1A    | fem-1 homolog a (C.elegans)                                          | 0.26 | 0.33 | 1.24 | 4.64E-15 |
| cg20095338 | NAP1L1   | nucleosome assembly protein 1-like 1                                 | 0.07 | 0.09 | 1.27 | 3.97E-07 |
| cg11323731 | AKR1A1   | aldo-keto reductase family 1; member A1                              | 0.03 | 0.05 | 1.41 | 2.19E-05 |
| cg26272237 | FLJ12118 | hypothetical protein LOC79587                                        | 0.03 | 0.04 | 1.23 | 1.77E-06 |
| cg12970724 | CRLF1    | cytokine receptor-like factor 1                                      | 0.04 | 0.06 | 1.25 | 6.81E-07 |
| cg13384396 | ADCY5    | adenylate cyclase 5                                                  | 0.08 | 0.12 | 1.44 | 7.17E-08 |
| cg17853587 | NDST3    | N-deacetylase/N-sulfotransferase (heparan glucosaminyl) 3            | 0.03 | 0.04 | 1.38 | 2.73E-13 |
| cg18459342 | TPD52    | tumor protein D52 isoform 1                                          | 0.17 | 0.21 | 1.23 | 4.23E-06 |
| cg05662500 | GPD1L    | glycerol-3-phosphate dehydrogenase 1-like                            | 0.02 | 0.03 | 1.43 | 1.11E-07 |
| cg20673075 | STK3     | serine/threonine kinase 3 (STE20 homolog; yeast)                     | 0.22 | 0.30 | 1.33 | 6.94E-11 |
| cg08141873 | HRAS     | v-Ha-ras Harvey rat sarcoma viral oncogene homolog isoform 2         | 0.08 | 0.11 | 1.37 | 1.01E-08 |
| cg25711779 | EFEMP1   | EGF-containing fibulin-like extracellular matrix protein 1 isoform b | 0.12 | 0.14 | 1.19 | 1.72E-09 |
| cg19706682 | LRRC50   | leucine rich repeat containing 50                                    | 0.13 | 0.15 | 1.20 | 1.4E-11  |
| cg26717786 | FLJ44861 | hypothetical protein LOC388428                                       | 0.06 | 0.09 | 1.43 | 2.28E-09 |
| cg04283377 | ARAF     | v-raf murine sarcoma 3611 viral oncogene homolog                     | 0.15 | 0.19 | 1.30 | 1.11E-15 |
| cg02121943 | TBX3     | T-box 3 protein isoform 1                                            | 0.10 | 0.12 | 1.21 | 1.62E-09 |
| cg02624129 | SNX19    | sorting nexin 19                                                     | 0.03 | 0.06 | 1.76 | 0        |
| cg00929606 | ZNF3     | zinc finger protein 3 isoform 2                                      | 0.10 | 0.15 | 1.54 | 0        |
| cg14455487 | FOXJ3    | forkhead box J3                                                      | 0.05 | 0.07 | 1.33 | 2.2E-09  |
| cg27227786 | DGKE     | diacylglycerol kinase epsilon                                        | 0.07 | 0.10 | 1.29 | 7.23E-07 |
| cg16956268 | CDK5RAP2 | CDK5 regulatory subunit associated protein 2 isoform a               | 0.03 | 0.05 | 1.37 | 1.27E-05 |
| cg03718539 | ETNK2    | ethanolamine kinase 2                                                | 0.31 | 0.38 | 1.22 | 1.74E-06 |
| cg08028004 | RANBP2   | RAN binding protein 2                                                | 0.05 | 0.07 | 1.38 | 3.44E-07 |
| cg08965527 | LRRC50   | leucine rich repeat containing 50                                    | 0.18 | 0.23 | 1.27 | 2.43E-08 |
| cg26771217 | CLK2     | CDC-like kinase 2 isoform 2                                          | 0.12 | 0.15 | 1.29 | 1.37E-06 |
| cg22469841 | FSTL1    | folliculin-like 1 precursor                                          | 0.04 | 0.06 | 1.29 | 4.3E-06  |
| cg14321399 | RRAGB    | Ras-related GTP binding B short isoform                              | 0.18 | 0.21 | 1.20 | 1.77E-10 |
| cg12582366 | FLJ32130 | hypothetical protein LOC146540                                       | 0.31 | 0.37 | 1.20 | 1.16E-05 |
| cg10398682 | BNC1     | basonuclin 1                                                         | 0.06 | 0.08 | 1.34 | 3.93E-06 |
| cg14242042 | SOX5     | SRY (sex determining region Y)-box 5 isoform c                       | 0.02 | 0.04 | 1.78 | 8.57E-06 |
| cg10005894 | ST6GAL1  | sialyltransferase 1 isoform a                                        | 0.02 | 0.03 | 1.54 | 2.33E-09 |
| cg05001145 | ELL2     | elongation factor; RNA polymerase II; 2                              | 0.04 | 0.05 | 1.35 | 3.34E-08 |
| cg25136310 | RPL36    | ribosomal protein L36                                                | 0.03 | 0.04 | 1.31 | 2.91E-05 |

|            |          |                                                                     |      |      |      |          |
|------------|----------|---------------------------------------------------------------------|------|------|------|----------|
| cg16363586 | BST2     | bone marrow stromal cell antigen 2                                  | 0.12 | 0.20 | 1.62 | 1.48E-06 |
| cg06627364 | MGC4677  | hypothetical protein LOC112597                                      | 0.02 | 0.03 | 1.36 | 2.25E-05 |
| cg17421623 | C3orf9   | hypothetical protein LOC56983                                       | 0.32 | 0.41 | 1.26 | 2.48E-07 |
| cg17959722 | MRPL41   | mitochondrial ribosomal protein L41                                 | 0.05 | 0.15 | 2.92 | 3.78E-05 |
| cg02002676 | APOBEC3B | apolipoprotein B mRNA editing enzyme; catalytic polypeptide-like 3B | 0.02 | 0.04 | 1.64 | 6.12E-06 |
| cg05876918 | PIP5K2C  | phosphatidylinositol-4-phosphate 5-kinase; type II; gamma           | 0.02 | 0.03 | 1.79 | 6.99E-07 |
| cg26097271 | MED6     | mediator of RNA polymerase II transcription; subunit 6 homolog      | 0.02 | 0.04 | 1.60 | 1.24E-07 |
| cg22766145 | BHLHB5   | basic helix-loop-helix domain containing; class B; 5                | 0.09 | 0.11 | 1.27 | 8.67E-09 |
| cg23127998 | FLRT3    | fibronectin leucine rich transmembrane protein 3 precursor          | 0.13 | 0.17 | 1.26 | 3.21E-12 |
| cg17096191 | NOS1AP   | nitric oxide synthase 1 (neuronal) adaptor protein                  | 0.02 | 0.03 | 1.47 | 3.36E-05 |
| cg13150441 | RNF40    | ring finger protein 40 isoform 1                                    | 0.04 | 0.05 | 1.43 | 9.1E-06  |
| cg02166313 | PAPOLA   | poly(A) polymerase alpha                                            | 0.03 | 0.04 | 1.42 | 1.25E-06 |

©2011 Landes Bioscience.  
Do not distribute.

**Supplemental Table 2.** Genes hypermethylated CD4+ T cells from lupus patients compared to controls. Target IDs represent unique IDs on Illumina Infinium HumanMethylation27 array, Symbol and Product represent gene name and description, Case and Control averages represent percent of methylation in each group, Ratio highlight the level of relative hypermethylation as compared with control group, *P* value represent statistical significance of associative t-test (0 indicates p-value too small to be outputted).

| Target ID  | Symbol   | Product                                                                    | Case average | Control average | Ratio | <i>P</i> value |
|------------|----------|----------------------------------------------------------------------------|--------------|-----------------|-------|----------------|
| cg00429618 | ZNF322B  | zinc finger protein 322B                                                   | 0.19         | 0.14            | 0.75  | 1.55E-15       |
| cg27567335 | RAMP1    | receptor activity-modifying protein 1 precursor                            | 0.13         | 0.10            | 0.73  | 1.2E-13        |
| cg14865868 | TRIB2    | tribbles homolog 2                                                         | 0.15         | 0.12            | 0.79  | 9.27E-07       |
| cg20395072 | GNPNAT1  | glucosamine-phosphate N-acetyltransferase 1                                | 0.48         | 0.37            | 0.77  | 1.93E-18       |
| cg07115304 | TRIB3    | tribbles 3                                                                 | 0.04         | 0.02            | 0.50  | 5.43E-27       |
| cg15774133 | EIF3S8   | eukaryotic translation initiation factor 3; subunit 8; 110kDa              | 0.17         | 0.12            | 0.68  | 1.71E-08       |
| cg06625811 | KIFAP3   | kinesin-associated protein 3                                               | 0.03         | 0.02            | 0.66  | 5.78E-07       |
| cg14775560 | FOLH1    | folate hydrolase 1 isoform 1                                               | 0.19         | 0.13            | 0.69  | 2.44E-10       |
| cg22621695 | DYRK2    | dual-specificity tyrosine-(Y)-phosphorylation regulated kinase 2 isoform 1 | 0.22         | 0.18            | 0.80  | 2.74E-06       |
| cg17091770 | STYX     | serine/threonine/tyrosine interacting protein                              | 0.03         | 0.02            | 0.60  | 3.04E-05       |
| cg13461622 | RUNX3    | runt-related transcription factor 3 isoform 2                              | 0.18         | 0.13            | 0.70  | 7.11E-15       |
| cg09577651 | SIRPB1   | signal-regulatory protein beta 1 precursor                                 | 0.11         | 0.08            | 0.75  | 1.65E-05       |
| cg15219393 | PPARGC1B | PGC-1-related estrogen receptor alpha coactivator                          | 0.06         | 0.04            | 0.74  | 7.24E-07       |
| cg04631202 | MAN1C1   | mannosidase; alpha; class 1C; member 1                                     | 0.43         | 0.34            | 0.79  | 6.89E-14       |
| cg14602164 | FBXO8    | F-box only protein 8                                                       | 0.06         | 0.05            | 0.82  | 5.54E-06       |
| cg03259469 | SVIL     | supervillin isoform 1                                                      | 0.05         | 0.04            | 0.79  | 7.99E-06       |
| cg19904653 | BRF2     | RNA polymerase III transcription initiation factor BRF2                    | 0.19         | 0.15            | 0.80  | 2.45E-05       |
| cg11593656 | COMMD6   | COMM domain containing 6 isoform b                                         | 0.10         | 0.08            | 0.79  | 9.77E-07       |
| cg26904212 | FXR2     | fragile X mental retardation syndrome related protein 2                    | 0.03         | 0.02            | 0.74  | 1E-05          |
| cg25264554 | XRN1     | 5prime-3' exoribonuclease 1                                                | 0.08         | 0.05            | 0.65  | 7.11E-07       |
| cg26829131 | HOXC9    | homeobox C9                                                                | 0.10         | 0.08            | 0.73  | 3.27E-08       |
| cg27626102 | STEAP2   | six transmembrane epithelial                                               | 0.08         | 0.06            | 0.80  | 1.77E-05       |

|            |           |                                                                  |      |      |      |          |
|------------|-----------|------------------------------------------------------------------|------|------|------|----------|
|            |           | antigen of the prostate 2                                        |      |      |      |          |
| cg16175263 | TNFRSF10C | tumor necrosis factor receptor superfamily; member 10c precursor | 0.10 | 0.08 | 0.79 | 2.79E-08 |
| cg21022247 | BIN2      | bridging integrator 2                                            | 0.41 | 0.32 | 0.78 | 1.96E-06 |
| cg21917349 | APBA2     | amyloid beta A4 precursor protein-binding; family A; member 2    | 0.38 | 0.31 | 0.82 | 3.15E-05 |
| cg20029201 | BCL9L     | B-cell CLL/lymphoma 9-like                                       | 0.35 | 0.27 | 0.78 | 5.98E-07 |
| cg07864632 | TRIP12    | thyroid hormone receptor interactor 12                           | 0.05 | 0.03 | 0.58 | 8.91E-11 |
| cg03160309 | PTGS2     | prostaglandin-endoperoxide synthase 2 precursor                  | 0.21 | 0.15 | 0.72 | 2.63E-06 |
| cg09491779 | C9orf82   | hypothetical protein LOC79886                                    | 0.28 | 0.18 | 0.62 | 4.38E-06 |
| cg18022926 | MAWBP     | MAWD binding protein isoform a                                   | 0.12 | 0.05 | 0.44 | 1.07E-14 |
| cg21885525 | SCYE1     | small inducible cytokine subfamily E; member 1                   | 0.29 | 0.20 | 0.71 | 4.1E-06  |
| cg05626013 | LRRTM3    | leucine rich repeat transmembrane neuronal 3                     | 0.49 | 0.32 | 0.64 | 0        |
| cg19857457 | RPL17     | ribosomal protein L17                                            | 0.22 | 0.12 | 0.54 | 3.23E-10 |
| cg02807450 | MTMR2     | myotubularin-related protein 2 isoform 1                         | 0.41 | 0.29 | 0.70 | 1.99E-06 |
| cg00885506 | WDR31     | WD repeat domain 31 isoform 2                                    | 0.08 | 0.06 | 0.78 | 3.03E-07 |
| cg26596161 | SLC26A7   | solute carrier family 26; member 7 isoform a                     | 0.12 | 0.08 | 0.66 | 1.16E-13 |
| cg17309462 | C20orf38  | hypothetical protein LOC55304                                    | 0.22 | 0.16 | 0.76 | 9.63E-10 |
| cg15563952 | DHTKD1    | dehydrogenase E1 and transketolase domain containing protein 1   | 0.05 | 0.04 | 0.74 | 3.43E-10 |
| cg11718315 | PARP16    | poly (ADP-ribose) polymerase family; member 16                   | 0.07 | 0.05 | 0.72 | 1.4E-06  |
| cg17630833 | MAPT      | microtubule-associated protein tau isoform 2                     | 0.04 | 0.03 | 0.63 | 0        |
| cg07964539 | TRFP      | Trf (TATA binding protein-related factor)-proximal homolog       | 0.14 | 0.11 | 0.77 | 4.46E-09 |
| cg26900034 | LOC51315  | hypothetical protein LOC51315                                    | 0.07 | 0.05 | 0.74 | 6.95E-08 |
| cg25421694 | RAB5A     | RAB5A; member RAS oncogene family                                | 0.15 | 0.11 | 0.79 | 9.33E-15 |
| cg10477754 | PPRC1     | PGC-1 related co-activator                                       | 0.04 | 0.03 | 0.70 | 7.35E-06 |
| cg25149927 | SSH1      | slingshot homolog 1                                              | 0.12 | 0.08 | 0.71 | 3.74E-05 |
| cg25425078 | CCND2     | cyclin D2                                                        | 0.12 | 0.08 | 0.67 | 9.98E-06 |
| cg19182046 | C14orf111 | hypothetical protein LOC51077                                    | 0.10 | 0.06 | 0.64 | 1.8E-06  |
| cg14331163 | RORB      | RAR-related orphan receptor B                                    | 0.12 | 0.10 | 0.78 | 1.56E-07 |

|            |          |                                                                                                |      |      |      |          |
|------------|----------|------------------------------------------------------------------------------------------------|------|------|------|----------|
| cg16049587 | BCDIN3   | bin3; bicoid-interacting 3                                                                     | 0.12 | 0.09 | 0.76 | 4.94E-06 |
| cg18264687 | MLLT3    | myeloid/lymphoid or mixed-lineage leukemia (trithorax homolog; Drosophila); translocated to; 3 | 0.07 | 0.05 | 0.66 | 1.42E-08 |
| cg16691888 | LRP2     | low density lipoprotein-related protein 2                                                      | 0.12 | 0.08 | 0.65 | 2.11E-14 |
| cg05593479 | TIGD1    | hypothetical protein LOC200765                                                                 | 0.06 | 0.04 | 0.67 | 1.02E-10 |
| cg02257681 | DDAH2    | dimethylarginine dimethylaminohydrolase 2                                                      | 0.05 | 0.02 | 0.50 | 2.86E-08 |
| cg27400772 | DPF1     | Neuro-d4 (rat) homolog                                                                         | 0.17 | 0.11 | 0.64 | 0        |
| cg03760705 | RNF185   | ring finger protein 185                                                                        | 0.10 | 0.06 | 0.62 | 0        |
| cg25985103 | MAN2C1   | mannosidase; alpha; class 2C; member 1                                                         | 0.17 | 0.12 | 0.73 | 8.53E-09 |
| cg04316754 | MMP24    | matrix metalloproteinase 24 preproprotein                                                      | 0.11 | 0.07 | 0.69 | 1.01E-07 |
| cg06476337 | NDUFS4   | NADH dehydrogenase (ubiquinone) Fe-S protein 4; 18kDa (NADH-coenzyme Q reductase)              | 0.21 | 0.14 | 0.68 | 1.47E-06 |
| cg02057157 | CNO      | cappuccino                                                                                     | 0.19 | 0.14 | 0.74 | 4.15E-08 |
| cg13170032 | HLX1     | H2.0-like homeo box 1                                                                          | 0.11 | 0.09 | 0.77 | 2.18E-07 |
| cg10011232 | FKBP8    | FK506-binding protein 8                                                                        | 0.07 | 0.05 | 0.68 | 6.16E-10 |
| cg02299653 | LSM5     | U6 snRNA-associated Sm-like protein 5                                                          | 0.06 | 0.02 | 0.39 | 5.28E-07 |
| cg05303448 | AACS     | acetoacetyl-CoA synthetase                                                                     | 0.25 | 0.18 | 0.72 | 0        |
| cg26727372 | ME2      | malic enzyme 2; NAD(+)-dependent; mitochondrial                                                | 0.12 | 0.09 | 0.78 | 1.8E-05  |
| cg01578341 | RKHD3    | ring finger and KH domain containing 3                                                         | 0.04 | 0.02 | 0.67 | 4.65E-12 |
| cg10107186 | PFDN5    | prefoldin 5 isoform alpha                                                                      | 0.14 | 0.10 | 0.72 | 7.2E-10  |
| cg12314510 | DYNLL2   | dynein light chain 2                                                                           | 0.04 | 0.03 | 0.64 | 3.73E-06 |
| cg26990660 | RAMP2    | receptor (calcitonin) activity modifying protein 2 precursor                                   | 0.04 | 0.03 | 0.71 | 2.77E-06 |
| cg08347960 | SCN2A2   | sodium channel; voltage-gated; type II; alpha 2                                                | 0.17 | 0.13 | 0.76 | 1.06E-09 |
| cg24928378 | RND1     | GTP-binding protein RHO6                                                                       | 0.14 | 0.10 | 0.69 | 5.37E-07 |
| cg04536575 | C14orf50 | hypothetical protein LOC145376                                                                 | 0.07 | 0.05 | 0.71 | 6.17E-08 |
| cg10450322 | CDKN2C   | cyclin-dependent kinase inhibitor 2C                                                           | 0.09 | 0.07 | 0.77 | 5.6E-08  |
| cg16924616 | DLX5     | distal-less homeo box 5                                                                        | 0.08 | 0.05 | 0.64 | 6.25E-08 |
| cg08211091 | FLJ37478 | hypothetical protein LOC339983                                                                 | 0.05 | 0.04 | 0.76 | 5.96E-06 |
| cg07448460 | GGH      | gamma-glutamyl hydrolase precursor                                                             | 0.05 | 0.04 | 0.67 | 6.68E-24 |
| cg00692549 | TARDBP   | TAR DNA binding protein                                                                        | 0.09 | 0.06 | 0.73 | 6.1E-08  |
| cg19595170 | SRF      | serum response factor (c-fos serum response element-binding transcription factor)              | 0.04 | 0.02 | 0.58 | 0        |

|            |          |                                                                           |      |      |      |          |
|------------|----------|---------------------------------------------------------------------------|------|------|------|----------|
| cg24784109 | HIST1H3D | H3 histone family; member B                                               | 0.11 | 0.09 | 0.80 | 6.9E-06  |
| cg00293409 | LRRRC33  | leucine rich repeat containing 33                                         | 0.04 | 0.03 | 0.75 | 1.6E-08  |
| cg22138278 | MAF1     | MAF1 protein                                                              | 0.04 | 0.03 | 0.70 | 7E-06    |
| cg17680902 | SKIV2L   | superkiller viralicidic activity 2-like homolog                           | 0.10 | 0.08 | 0.78 | 3.47E-10 |
| cg10753582 | KIFAP3   | kinesin-associated protein 3                                              | 0.04 | 0.03 | 0.79 | 1.54E-06 |
| cg12086773 | C2orf25  | hypothetical protein LOC27249                                             | 0.05 | 0.02 | 0.52 | 2.17E-05 |
| cg13216057 | DKK3     | dickkopf homolog 3 precursor                                              | 0.05 | 0.03 | 0.64 | 2.27E-05 |
| cg22967298 | PCNP     | PEST-containing nuclear protein                                           | 0.04 | 0.03 | 0.68 | 2.17E-05 |
| cg20273774 | GNB2L1   | guanine nucleotide binding protein (G protein); beta polypeptide 2-like 1 | 0.16 | 0.12 | 0.75 | 1.14E-07 |
| cg06367117 | ALDOC    | fructose-bisphosphate aldolase C                                          | 0.07 | 0.04 | 0.62 | 2.06E-05 |
| cg13284426 | RAB24    | RAB24 gene product isoform 2                                              | 0.63 | 0.51 | 0.81 | 0        |
| cg17272843 | KCTD14   | potassium channel tetramerisation domain containing 14                    | 0.22 | 0.16 | 0.74 | 5.66E-14 |
| cg20404387 | FAM43B   | hypothetical protein LOC163933                                            | 0.10 | 0.07 | 0.71 | 1.84E-06 |
| cg11320084 | RNF2     | ring finger protein 2                                                     | 0.14 | 0.11 | 0.79 | 5.68E-06 |
| cg15454483 | SNX12    | sorting nexin 12                                                          | 0.15 | 0.11 | 0.77 | 4.7E-07  |
| cg15827031 | NUP155   | nucleoporin 155kDa isoform 2                                              | 0.04 | 0.02 | 0.69 | 9.75E-07 |
| cg11412582 | HERC2    | hect domain and RLD 2                                                     | 0.26 | 0.16 | 0.62 | 5.4E-06  |
| cg01943185 | NMU      | neuromedin U                                                              | 0.04 | 0.03 | 0.70 | 5.54E-12 |
| cg03876618 | IGFBP7   | insulin-like growth factor binding protein 7                              | 0.07 | 0.06 | 0.82 | 2.66E-05 |
| cg15786837 | HOXB13   | homeo box B13                                                             | 0.05 | 0.04 | 0.78 | 8.42E-06 |
| cg02007844 | KCNJ8    | potassium inwardly-rectifying channel J8                                  | 0.03 | 0.03 | 0.80 | 1.31E-05 |
| cg08797194 | UGCGL2   | UDP-glucose:glycoprotein glucosyltransferase 2                            | 0.22 | 0.17 | 0.77 | 1.18E-06 |
| cg13297960 | NCAM2    | neural cell adhesion molecule 2 precursor                                 | 0.09 | 0.06 | 0.76 | 1.41E-08 |
| cg27243140 | OTOP3    | otopetrin 3                                                               | 0.40 | 0.33 | 0.82 | 0        |
| cg01311051 | ALDOA    | aldolase A                                                                | 0.17 | 0.13 | 0.77 | 6.7E-10  |
| cg06190053 | PGM5     | phosphoglucomutase 5                                                      | 0.21 | 0.16 | 0.76 | 6.59E-06 |
| cg09872616 | MEST     | mesoderm specific transcript isoform b                                    | 0.08 | 0.04 | 0.49 | 1.55E-05 |
| cg02084087 | TNFRSF25 | tumor necrosis factor receptor superfamily; member 25 isoform 2 precursor | 0.05 | 0.03 | 0.73 | 3.11E-07 |
